# Supplementary material for: Prevalence and Aetiology of Molar Incisor Hypomineralization in Children: A Cross- Sectional Study
Source: Research Square preprint supplement (doi:10.21203/rs.3.rs-6888304/v1), 2025-07-14
Supplement: Supplementary file 2 [file 32832db6da01d01b4176d256.docx]

|  |  | **MIH-1** | | | **MIH-2** | | |  |  |
| --- | --- | --- | --- | --- | --- | --- | --- | --- | --- |
|  |  | **n** | **%** | **%G.** | **n** | **%** | **%G.** | **Test statistics** | ***p*** |
| **Gender** | Girl | 9 | 27,3 | 75,0 | 24 | 72,7 | 63,2 | - | 0,510 |
|  | Boy | 3 | 17,6 | 25,0 | 14 | 82,4 | 36,8 |  |  |
| **BMI** | ≤-2-patological Developmental delay | 0 | 0,0 | 0,0 | 2 | 100,0 | 5,3 | 0,941 | 0,804 |
|  | -2/+2 ı-normal | 11 | 27,5 | 91,7 | 29 | 72,5 | 76,3 |  |  |
|  | ≥2-patological, Obesity | 1 | 12,5 | 8,3 | 7 | 87,5 | 18,4 |  |  |
| **Delivery type** | NSVD | 7 | 25,9 | 58,3 | 20 | 74,1 | 52,6 | 0,119‡ | 0,730 |
|  | C-S | 5 | 21,7 | 41,7 | 18 | 78,3 | 47,4 |  |  |
| **Pregnancy Complications** | Yes | 3 | 27,3 | 25,0 | 8 | 72,7 | 21,1 | - | 1,000 |
| No | 9 | 23,1 | 75,0 | 30 | 76,9 | 78,9 |  |  |
| **Birth Weight** | 2,5 kg- 3,5 kg-Normal | 5 | 21,7 | 41,7 | 18 | 78,3 | 47,4 | 0,119‡ | 0,730 |
|  | ≥3,5 kg-LGA | 7 | 25,9 | 58,3 | 20 | 74,1 | 52,6 |  |  |
| **Birth lenght** | ≤50 cm | 7 | 26,9 | 58,3 | 19 | 73,1 | 50,0 | 0,254‡ | 0,614 |
|  | >50 cm | 5 | 20,8 | 41,7 | 19 | 79,2 | 50,0 |  |  |
| **Gestational age** | ≤37-premature | 2 | 18,2 | 16,7 | 9 | 81,8 | 23,7 | 1,449 | 0,568 |
| 37-40 | 5 | 35,7 | 41,7 | 9 | 64,3 | 23,7 |  |  |
|  | ≥40 | 5 | 20,0 | 41,7 | 20 | 80,0 | 52,6 |  |  |
| **Number of births** | 1 | 3 | 50,0 | 25,0 | 3 | 50,0 | 8,1 | 4,136 | 0,329 |
| 2 | 6 | 27,3 | 50,0 | 16 | 72,7 | 43,2 |  |  |
|  | 3 | 2 | 12,5 | 16,7 | 14 | 87,5 | 37,8 |  |  |
|  | 4 | 1 | 33,3 | 8,3 | 2 | 66,7 | 5,4 |  |  |
|  | 5 | 0 | 0,0 | 0,0 | 2 | 100,0 | 5,4 |  |  |
| **Family type** | Extended | 1 | 12,5 | 8,3 | 7 | 87,5 | 18,4 | - | 0,661 |
|  | Nuclear | 11 | 26,2 | 91,7 | 31 | 73,8 | 81,6 |  |  |
| **Economical statue** | Below minimum wage | 0 | 0,0 | 0,0 | 2 | 100,0 | 5,3 | 0,482 | 1,000 |
|  | Minimum wage | 4 | 22,2 | 33,3 | 14 | 77,8 | 36,8 |  |  |
|  | Above minimum wage | 8 | 26,7 | 66,7 | 22 | 73,3 | 57,9 |  |  |
| **Mother’s education** | Primary ed. | 1 | 7,7 | 8,3 | 12 | 92,3 | 31,6 | 2,593 | 0,299 |
| Secondary ed. | 7 | 29,2 | 58,3 | 17 | 70,8 | 44,7 |  |  |
|  | Higher ed. | 4 | 30,8 | 33,3 | 9 | 69,2 | 23,7 |  |  |
| **Father‘s education** | Primary ed | 2 | 13,3 | 16,7 | 13 | 86,7 | 34,2 | 2,851 | 0,252 |
| Secondary ed | 5 | 21,7 | 41,7 | 18 | 78,3 | 47,4 |  |  |
|  | Higher ed | 5 | 41,7 | 41,7 | 7 | 58,3 | 18,4 |  |  |
| **Employment statue of mother** | Unemployed | 7 | 18,9 | 58,3 | 30 | 81,1 | 78,9 | - | 0,256 |
| Employed | 5 | 38,5 | 41,7 | 8 | 61,5 | 21,1 |  |  |
| **Employment statue of father** | Unemployed | 1 | 50,0 | 8,3 | 1 | 50,0 | 2,6 | - | 0,426 |
| Employed | 11 | 22,9 | 91,7 | 37 | 77,1 | 97,4 |  |  |
| **Exposure to sigarette smoke** | Yes | 7 | 29,2 | 58,3 | 17 | 70,8 | 44,7 | 0,675‡ | 0,411 |
| No | 5 | 19,2 | 41,7 | 21 | 80,8 | 55,3 |  |  |
| **Vitamin D supplement** | Yes | 1 | 25,0 | 8,3 | 3 | 75,0 | 7,9 | - | 1,000 |
|  | No | 11 | 23,9 | 91,7 | 35 | 76,1 | 92,1 |  |  |
| **Iron supplement** | Yes | 1 | 100,0 | 8,3 | 0 | 0,0 | 0,0 | - | 0,240 |
|  | No | 11 | 22,4 | 91,7 | 38 | 77,6 | 100,0 |  |  |
| **Multivitamin** | Yes | 1 | 33,3 | 8,3 | 2 | 66,7 | 5,3 | - | 1,000 |
|  | No | 11 | 23,4 | 91,7 | 36 | 76,6 | 94,7 |  |  |
| **<1 age feeding** | Breastfeeding and complementary feeding | 12 | 25,0 | 100,0 | 36 | 75,0 | 94,7 | - | 1,000 |
| Only formula | 0 | 0,0 | 0,0 | 2 | 100,0 | 5,3 |  |  |

Table 3: Distribution of demographic characteristics according to severity groups and the relationships between them
