# Supplementary material for: Prevalence and Aetiology of Molar Incisor Hypomineralization in Children: A Cross- Sectional Study
Source: Research Square preprint supplement (doi:10.21203/rs.3.rs-6888304/v1), 2025-07-14
Supplement: Supplementary file 3 [file 53e95698b32bcce88a5b64ec.docx]

Table 4: Distribution and comparison of biochemical measurements according to severity groups

|  | **MIH-1 (n=12)** | | **MIH-2 (n=38)** | |  |  |
| --- | --- | --- | --- | --- | --- | --- |
|  | **Median (Min.-Maks.)** | **Mean.±Standard Deviation.** | **Median (Min.-Maks.)** | **Mean.±Standard Devitation.** | **Test Statistics** | ***p*** |
| **ALP (U/L)** | 233 (131-397) | 248,92±82,14 | 247,5 (152-397) | 255,84±59,73 | -0,319 | 0,751 |
| **Urine (mg/dL)** | 22,5 (14-31) | 21,92±4,81 | 18,5 (12-28) | 19,08±3,91 | 2,071 | 0,044* |
| **Creatinine (mg/dL)** | 0,44 (0,3-0,56) | 0,44±0,08 | 0,42 (0,28-0,69) | 0,44±0,09 | -0,649† | 0,517 |
| **Ca (mg/dL)** | 9,8 (9,1-10,4) | 9,82±0,35 | 9,65 (8,9-10,2) | 9,63±0,33 | 1,689 | 0,098 |
| **P (mg/dL)** | 4,71 (3,89-5,55) | 4,64±0,51 | 4,55 (3,58-6,65) | 4,57±0,6 | -0,613† | 0,540 |
| **Fe (µg/dL)** | 73 (28-130) | 68,83±30,81 | (75,5) 24-135 | 75,32±26,33 | -0,714 | 0,479 |
| **TIBC (µg /dL)** | 393 (265-479) | 389,25±54,03 | (358,5) 252-440 | 357,03±44,11 | 2,090 | 0,042* |
| **Leucosyte (10^3/ µL)** | 6,8 (4,1-9,2) | 6,71±1,46 | 7,19 (5-15,29) | 8,11±2,72 | -1,567† | 0,117 |
| **Neutrophyl # (10^3/ µL)** | 3,7 (1,74-6,32) | 3,84±1,34 | 3,87 (2,09-9,49) | 4,19±1,96 | -0,159† | 0,874 |
| **Lymphocyte# (10^3/ µL)** | 2,15 (1,03-3,41) | 2,22±0,64 | 2,82 (1,22-7,37) | 2,97±1,07 | -2,499† | 0,012* |
| **Monocyte# (10^3/ µL)** | 0,5 (0,27-0,61) | 0,48±0,09 | 0,57 (0,34-1,25) | 0,62±0,22 | -2,195† | 0,028* |
| **Eosinophil # (10^3/ µL** | 0,11 (0,06-0,44) | 0,14±0,11 | 0,23 (0,06-1,5) | 0,29±0,26 | -2,594† | 0,009* |
| **Basophile #(10^3/ µL)** | 0,04 (0,02-0,06) | 0,04±0,02 | 0,04 (0,01-0,14) | 0,04±0,03 | -0,715† | 0,474 |
| **Eritrocyte (10^6/ µL** | 4,68 (4,32-5,08) | 4,7±0,28 | 4,84 (4,14-5,51) | 4,8±0,3 | -0,996 | 0,324 |
| **Hg (g/dL)** | 12,95 (11,1-13,8) | 12,92±0,82 | 13,2 (11,1-14,5) | 13,12±0,77 | -0,791 | 0,433 |
| **HCT (%)** | 38,15 (33,7-41,5) | 38,25±2,37 | 39 (33,6-42,5) | 38,84±2 | -0,848 | 0,400 |
| **MCV (f/L)** | 82 (76,6-85,3) | 81,42±2,78 | 81 (75,7-87,8) | 81,09±3,38 | 0,301 | 0,765 |
| **MCH (pg)** | 27,8 (24,2-29,6) | 27,53±1,45 | 27,65 (23,5-30,3) | 27,39±1,51 | 0,279 | 0,782 |
| **MCHC (g/dL)** | 33,65 (31,6-36,5) | 33,78±1,17 | 33,8 (30,8-36,5) | 33,78±1,17(33,8) | -0,003 | 0,997 |
| **PLT (Trombocyte) (** | 335 (234-388) | 327,75±48,38 | 308,5 (187-479) | 320,21±75,72(308,5) | 0,405 | 0,688 |
| **Sedimentation 1h (mm)** | 5 (2-24) | 8,58±6,44 | 7 (2-35) | 7,92±6,62 | -0,230† | 0,818 |
| **Total IgE (kU/L)** | 28,5 (10,6-189) | 46,6±49,44 | 69,7 (0,8-1389) | 164,63±268,98 | -1,090† | 0,276 |
| **Ferritin (µg/L)** | 23,45 (10,4-71,8) | 29,86±18,43 | 30,5 (10,9-115) | 35,68±22,79 | -0,807† | 0,420 |
| **Vitamin B12 (ng/L)** | 365 (224-726) | 396,25±142,18 | 396,5 (192-873) | 414,37±159,74 | -0,125† | 0,901 |
| **PTH (ng/L)** | 42,35 (20,7-92,1) | 46,12±21,13 | 30,75 (19,7-185) | 42,77±31,25 | -1,113† | 0,266 |
| **Vitamin D (ng/mL)** | 16,5 (7-22) | 16,17±4,61 | 17,5 (7-34) | 17,29±6,61 | -0,341† | 0,733 |
