# Supplementary material for: Prevalence and Aetiology of Molar Incisor Hypomineralization in Children: A Cross- Sectional Study
Source: Research Square preprint supplement (doi:10.21203/rs.3.rs-6888304/v1), 2025-07-14
Supplement: Supplementary file 4 [file db6fd55fa7cd6f1bba821e32.docx]

|  |  | **Study Group** | | | **Control Group** | | |  |  |
| --- | --- | --- | --- | --- | --- | --- | --- | --- | --- |
|  |  | **n** | **%** | **%G.** | **n** | **%** | **%G.** | **Test Statistics** | ***p*** |
| **Gender** | **Girl** | 33 | 57,9 | 66,0 | 24 | 42,1 | 48,0 | 3,305 | 0,069 |
|  | **Boy** | 17 | 39,5 | 34,0 | 26 | 60,5 | 52,0 |  |  |
| **Age (years)** | **6-12** | 50 |  |  | 50 |  |  | -0,319 | 0.750 |
| **Family type** | **Extended** | 8 | 66,7 | 16,0 | 4 | 33,3 | 8,0 | 1,515 | 0,218 |
|  | **Nuclear** | 42 | 47,7 | 84,0 | 46 | 52,3 | 92,0 |  |  |
| **BMI** | **Developmental Delay** | 2 | 100,0 | 4,0 | 0 | 0,0 | 0,0 | 7,963‡ | 0,009* |
|  | **Normal** | 40 | 44,9 | 80,0 | 49 | 55,1 | 98,0 |  |  |
|  | **Obesity** | 8 | 88,9 | 16,0 | 1 | 11,1 | 2,0 |  |  |
|  |  |  |  |  |  |  |  |  |  |
|  |  |  |  |  |  |  |  |  |  |
| **Economical statue** | **Below minimum wage** | 2 | 66,7 | 4,0 | 1 | 33,3 | 2,0 | 17,932‡ | <0,001* |
|  | **Minimum wage** | 18 | 90,0 | 36,0 | 2 | 10,0 | 4,0 |  |  |
|  | **Above minimum wage** | 30 | 39,0 | 60,0 | 47 | 61,0 | 94,0 |  |  |
|  |  |  |  |  |  |  |  |  |  |
| **Mother’s education** | **Primary ed.** | 13 | 68,4 | 26,0 | 6 | 31,6 | 12,0 | 8,674 | 0,013* |
| **Secondary ed.** | 24 | 58,5 | 48,0 | 17 | 41,5 | 34,0 |  |  |
|  | **Higher ed.** | 13 | 32,5 | 26,0 | 27 | 67,5 | 54,0 |  |  |
|  |  |  |  |  |  |  |  |  |  |
| **Father’ education** | **Primary ed.** | 15 | 78,9 | 30,0 | 4 | 21,1 | 8,2 | 16,945 | <0,001* |
| **Secondary ed.** | 23 | 62,2 | 46,0 | 14 | 37,8 | 28,6 |  |  |
|  | **Higher ed.** | 12 | 27,9 | 24,0 | 31 | 72,1 | 63,3 |  |  |
|  |  |  |  |  |  |  |  |  |  |
| **Employment statue of mother** | **Unemployed** | 37 | 71,2 | 74,0 | 15 | 28,8 | 30,0 | 19,391 | <0,001* |
| **Employed** | 13 | 27,1 | 26,0 | 35 | 72,9 | 70,0 |  |  |
|  |  |  |  |  |  |  |  |  |  |
| **Employment statue of father** | **Unemployed** | 2 | 100,0 | 4,0 | 0 | 0,0 | 0,0 | -‡ | 0,495 |
| **Employed** | 48 | 49,5 | 96,0 | 49 | 50,5 | 100,0 |  |  |
|  |  |  |  |  |  |  |  |  |  |
| **Delivery type** | **NSVD** | 27 | 57,4 | 54,0 | 20 | 42,6 | 40,0 | 1,967 | 0,161 |
|  | **CS** | 23 | 43,4 | 46,0 | 30 | 56,6 | 60,0 |  |  |
|  |  |  |  |  |  |  |  |  |  |
| **Pregnancy complications** | **Yes** | 11 | 68,8 | 22,0 | 5 | 31,3 | 10,0 | 2,679 | 0,102 |
| **No** | 39 | 46,4 | 78,0 | 45 | 53,6 | 90,0 |  |  |
|  |  |  |  |  |  |  |  |  |  |
| **Birth weight** | **≤2,5 kg LBW** | 0 | 0,0 | 0,0 | 5 | 100,0 | 10,0 | 15,225‡ | <0,001* |
|  | **2,5 kg- 3,5 kg-NBW** | 23 | 39,7 | 46,0 | 35 | 60,3 | 70,0 |  |  |
|  | **≥3,5 kg-LGA** | 27 | 73,0 | 54,0 | 10 | 27,0 | 20,0 |  |  |
|  |  |  |  |  |  |  |  |  |  |
| **Birth lenght** | **≤50 cm** | 26 | 45,6 | 52,0 | 31 | 54,4 | 62,0 | 1,020 | 0,313 |
|  | **>50 cm** | 24 | 55,8 | 48,0 | 19 | 44,2 | 38,0 |  |  |
|  |  |  |  |  |  |  |  |  |  |
|  |  |  |  |  |  |  |  |  |  |
| **Gestational agé** | **≤37-premature** | 11 | 64,7 | 22,0 | 6 | 35,3 | 12,0 | 8,113 | 0,017* |
|  | **37-40** | 14 | 33,3 | 28,0 | 28 | 66,7 | 56,0 |  |  |
|  | **≥40** | 25 | 61,0 | 50,0 | 16 | 39,0 | 32,0 |  |  |
|  |  |  |  |  |  |  |  |  |  |
| **Number of births** | **1** | 6 | 22,2 | 12,2 | 21 | 77,8 | 42,0 | 19,334‡ | <0,001* |
| **2** | 22 | 51,2 | 44,9 | 21 | 48,8 | 42,0 |  |  |
|  | **3** | 16 | 80,0 | 32,7 | 4 | 20,0 | 8,0 |  |  |
|  | **4** | 3 | 60,0 | 6,1 | 2 | 40,0 | 4,0 |  |  |
|  | **5** | 2 | 100,0 | 4,1 | 0 | 0,0 | 0,0 |  |  |
|  | **6** | 0 | 0,0 | 0,0 | 2 | 100,0 | 4,0 |  |  |
|  |  |  |  |  |  |  |  |  |  |
| **Exposure to sigarette smoke** | **Yes** | 24 | 77,4 | 48,0 | 7 | 22,6 | 14,0 | 13,511‡ | <0,001* |
| **No** | 26 | 37,7 | 52,0 | 43 | 62,3 | 86,0 |  |  |
|  |  |  |  |  |  |  |  |  |  |
| **Vit D supplement** | **Yes** | 4 | 28,6 | 8,0 | 10 | 71,4 | 20,0 | 2,990 | 0,084 |
|  | **No** | 46 | 53,5 | 92,0 | 40 | 46,5 | 80,0 |  |  |
|  |  |  |  |  |  |  |  |  |  |
| **Iron supplement** | **Yes** | 1 | 50,0 | 2,0 | 1 | 50,0 | 2,0 | -‡ | 1,000 |
|  | **No** | 49 | 50,0 | 98,0 | 49 | 50,0 | 98,0 |  |  |
|  |  |  |  |  |  |  |  |  |  |
| **Multivitamin** | **Yes** | 3 | 25,0 | 6,0 | 9 | 75,0 | 18,0 | 3,409 | 0,065 |
|  | **No** | 47 | 53,4 | 94,0 | 41 | 46,6 | 82,0 |  |  |
|  |  |  |  |  |  |  |  |  |  |
| **Feeding** | **Exclusive breastfeeding** | 0 | 0,0 | 0,0 | 6 | 100,0 | 12,0 | 6,758‡ | 0,026* |
|  | **Breastfeeding and formula** | 48 | 52,7 | 96,0 | 43 | 47,3 | 86,0 |  |  |
|  | **Formula and complementery feeding** | 2 | 66,7 | 4,0 | 1 | 33,3 | 2,0 |  |  |
|  |  |  |  |  |  |  |  |  |  |
| **Tonsillitis** | **Yes** | 27 | 93,1 | 54,0 | 2 | 6,9 | 4,0 | 30,355 | <0,001* |
|  | **No** | 23 | 32,4 | 46,0 | 48 | 67,6 | 96,0 |  |  |
|  |  |  |  |  |  |  |  |  |  |
| **Bronchitis** | **Yes** | 13 | 76,5 | 26,0 | 4 | 23,5 | 8,0 | 5,741 | 0,017* |
|  | **No** | 37 | 44,6 | 74,0 | 46 | 55,4 | 92,0 |  |  |
|  |  |  |  |  |  |  |  |  |  |
| **Asthma** | **Yes** | 9 | 90,0 | 18,0 | 1 | 10,0 | 2,0 | 7,111 | 0,008* |
|  | **No** | 41 | 45,6 | 82,0 | 49 | 54,4 | 98,0 |  |  |
|  |  |  |  |  |  |  |  |  |  |
| **Otitis** | **Yes** | 9 | 75,0 | 18,0 | 3 | 25,0 | 6,0 | 3,409 | 0,065 |
|  | **No** | 41 | 46,6 | 82,0 | 47 | 53,4 | 94,0 |  |  |
|  |  |  |  |  |  |  |  |  |  |
| **Febrile conditions** | **Yes** | 16 | 84,2 | 32,0 | 3 | 15,8 | 6,0 | 10,981 | 0,001* |
|  | **No** | 34 | 42,0 | 68,0 | 47 | 58,0 | 94,0 |  |  |
|  |  |  |  |  |  |  |  |  |  |
| **Allergic rhinitis** | **Yes** | 17 | 81,0 | 34,0 | 4 | 19,0 | 8,0 | 10,187 | 0,001* |
|  | **No** | 33 | 41,8 | 66,0 | 46 | 58,2 | 92,0 |  |  |
|  |  |  |  |  |  |  |  |  |  |
| **Atopic dermatitis** | **Yes** | 11 | 91,7 | 22,0 | 1 | 8,3 | 2,0 | 9,470 | 0,002* |
|  | **No** | 39 | 44,3 | 78,0 | 49 | 55,7 | 98,0 |  |  |
|  |  |  |  |  |  |  |  |  |  |
| **Food allergy** | **Yes** | 8 | 61,5 | 16,0 | 5 | 38,5 | 10,0 | 0,796 | 0,372 |
|  | **No** | 42 | 48,3 | 84,0 | 45 | 51,7 | 90,0 |  |  |
|  |  |  |  |  |  |  |  |  |  |
| **General allergies** | **Yes** | 14 | 60,9 | 28,0 | 9 | 39,1 | 18,0 | 1,412 | 0,235 |
|  | **No** | 36 | 46,8 | 72,0 | 41 | 53,2 | 82,0 |  |  |
|  |  |  |  |  |  |  |  |  |  |
| **Sepsis** | **Yes** | 4 | 100,0 | 8,0 | 0 | 0,0 | 0,0 | -‡ | 0,117 |
|  | **No** | 46 | 47,9 | 92,0 | 50 | 52,1 | 100,0 |  |  |
|  |  |  |  |  |  |  |  |  |  |
| **UTI** | **Yes** | 20 | 87,0 | 40,0 | 3 | 13,0 | 6,0 | 16,318 | <0,001* |
| **No** | 30 | 39,0 | 60,0 | 47 | 61,0 | 94,0 |  |  |
|  |  |  |  |  |  |  |  |  |  |
| **ID** | **Yes** | 1 | 100,0 | 2,0 | 0 | 0,0 | 0,0 | -‡ | 1,000 |
| **No** | 49 | 49,5 | 98,0 | 50 | 50,5 | 100,0 |  |  |
|  |  |  |  |  |  |  |  |  |  |
| **Neonatal Jaundice** | **Yes** | 20 | 71,4 | 40,0 | 8 | 28,6 | 16,0 | 7,143 | 0,008* |
|  | **No** | 30 | 41,7 | 60,0 | 42 | 58,3 | 84,0 |  |  |
|  |  |  |  |  |  |  |  |  |  |
| **Developmental Delay** | **Yes** | 2 | 100,0 | 4,0 | 0 | 0,0 | 0,0 | -‡ | 0,495 |
|  | **No** | 48 | 49,0 | 96,0 | 50 | 51,0 | 100,0 |  |  |
|  |  |  |  |  |  |  |  |  |  |
| **Immunodeficiency** | **Yes** | 1 | 100,0 | 2,0 | 0 | 0,0 | 0,0 | -‡ | 1,000 |
|  | **No** | 49 | 49,5 | 98,0 | 50 | 50,5 | 100,0 |  |  |
|  |  |  |  |  |  |  |  |  |  |
| **Measles** | **Yes** | 5 | 100,0 | 10,0 | 0 | 0,0 | 0,0 | -‡ | 0,056 |
|  | **No** | 45 | 47,4 | 90,0 | 50 | 52,6 | 100,0 |  |  |
|  |  |  |  |  |  |  |  |  |  |
| **Chickenpox** | **Yes** | 6 | 75,0 | 12,0 | 2 | 25,0 | 4,0 | -‡ | 0,269 |
|  | **No** | 44 | 47,8 | 88,0 | 48 | 52,2 | 96,0 |  |  |
|  |  |  |  |  |  |  |  |  |  |
| **Hand Foot Mouth Disease** | **Yes** | 10 | 76,9 | 20,0 | 3 | 23,1 | 6,0 | 4,332 | 0,037* |
| **No** | 40 | 46,0 | 80,0 | 47 | 54,0 | 94,0 |  |  |
|  |  |  |  |  |  |  |  |  |  |
| **AGE** | **Yes** | 6 | 100,0 | 12,0 | 0 | 0,0 | 0,0 | -‡ | 0,027* |
|  | **No** | 44 | 46,8 | 88,0 | 50 | 53,2 | 100,0 |  |  |
|  |  |  |  |  |  |  |  |  |  |
| **Cardiac Diseases** | **Yes** | 7 | 100,0 | 14,0 | 0 | 0,0 | 0,0 | -‡ | 0,012* |
|  | **No** | 43 | 46,2 | 86,0 | 50 | 53,8 | 100,0 |  |  |
|  |  |  |  |  |  |  |  |  |  |
| **Pneumonia** | **Yes** | 5 | 100,0 | 10,0 | 0 | 0,0 | 0,0 | -‡ | 0,056 |
|  | **No** | 45 | 47,4 | 90,0 | 50 | 52,6 | 100,0 |  |  |
|  |  |  |  |  |  |  |  |  |  |
| **Age at Onset Illnesses** | **No illnesses** | 0 | 0,0 | 0,0 | 16 | 100,0 | 32,0 | 41,661 | <0,001* |
| **had <3 age** | 41 | 80,4 | 82,0 | 10 | 19,6 | 20,0 |  |  |
|  | **had >3 age** | 9 | 27,3 | 18,0 | 24 | 72,7 | 48,0 |  |  |
|  |  |  |  |  |  |  |  |  |  |
| **Antibiotic Use before age 3** | **Yes** | 45 | 81,8 | 91,8 | 10 | 18,2 | 20,0 | 51,722 | <0,001* |
| **No** | 4 | 9,1 | 8,2 | 40 | 90,9 | 80,0 |  |  |

*Significant values

‡: Pearson Chi Square test, %: Row percentage and %G.: Column percentage for patient groups

LBW: Low Birth Weight NBW: Normal Birth Weight LGA: Large for Gestational Age

AGE: Acute Gastroenteritis ID: Intellectuel Disability UTI: Urine Tract Infection

Table-1: Comparison of demographic and clinical characteristics among patient groups and the relationships between these characteristics
