# Supplementary material for: Prevalence and Aetiology of Molar Incisor Hypomineralization in Children: A Cross- Sectional Study
Source: Research Square preprint supplement (doi:10.21203/rs.3.rs-6888304/v1), 2025-07-14
Supplement: Supplementary file 5 [file f8d16598c92959cce49b3db5.docx]

**Table 2: Comparison of anthropometric measurements and feeding characteristics between the study group and the control group.**

|  | **Study group** | | **Control group** | |  |  |
| --- | --- | --- | --- | --- | --- | --- |
|  | **Min.-Max.** | **Mean**± **standard deviation** | **Min.-max.** | **Mean**± **standard deviation** | **Test Statistics** | ***p*** |
| **Duration of exclusive breastfeeding (months)** | 0-10 | 5,02±2,4(6) | 0-14 | 6,44±2,52(6) | -2,329 | 0,020* |
| **Total duration of breastfeeding ((months)** | 0-36 | 18,72±9,48(20) | 0-30 | 15,74±7,81(15) | -1,599 | 0,110 |

*Significant value
